# **Sleep deprivation negatively impacts reproductive output in *Drosophila melanogaster***

Sheetal Potdar<sup>1</sup>, Danita K. Daniel<sup>1</sup>, Femi A. Thomas<sup>1</sup>, Shraddha Lall<sup>2</sup>, Vasu Sheeba<sup>1, 2, \*</sup>

**Affiliation:** Behavioural Neurogenetics Laboratory, <sup>1</sup>Evolutionary and Integrative Biology Unit, <sup>2</sup>Neuroscience Unit, Jawaharlal Nehru Centre for Advanced Scientific Research, Bangalore, INDIA.

**\*Corresponding author:** Vasu Sheeba

**Running title:** Sleep loss reduces egg output.

**Address:** Behavioural Neurogenetics Laboratory, Evolutionary and Integrative Biology Unit, Neuroscience Unit, Jawaharlal Nehru Centre for Advanced Scientific Research, Jakkur P.O., Bangalore – 560 064, Karnataka, INDIA.

**Email:** [sheeba@jncasr.ac.in](mailto:sheeba@jncasr.ac.in), Ph. No: +91-80-22082987, Fax: +91-80-22082766

## 1 **Abstract**

2 Most animals sleep or exhibit a sleep-like state, yet the adaptive significance of this phenomenon  
3 remains unclear. Although reproductive deficits are associated with lifestyle induced sleep  
4 deficiencies, how sleep loss affects reproductive physiology is poorly understood, even in model  
5 organisms. We aimed to bridge this mechanistic gap by impairing sleep in female fruit flies and  
6 testing its effect on egg output. We find that sleep deprivation by feeding caffeine or by mechanical  
7 perturbation results in decreased egg output. Transient activation of wake-promoting dopaminergic  
8 neurons decreases egg output in addition to sleep levels, thus demonstrating a direct negative impact  
9 of sleep deficit on reproductive output. Similarly, loss-of-function mutation in dopamine transporter  
10 *fumin (fmn)* leads to both significant sleep loss and lowered fecundity. This demonstration of a direct  
11 relationship between sleep and reproductive fitness indicates a strong driving force for the evolution  
12 of sleep.

13 **Key words:** Sleep deprivation, egg output, *Drosophila melanogaster*, caffeine, dopamine, fecundity.

## 14 **Introduction**

15 Almost all animals show activity/rest cycles in response to daily solar cycles of light, temperature and  
16 other environmental cues. The rest phase of sleep is remarkably ubiquitous in animals suggesting that  
17 sleep is important. While we humans spend a third of our lives sleeping, we do not know *why* sleep is  
18 indispensable. Several studies link sleep levels to cognition, mood and emotional states (Krause et al.,  
19 2017), as well as physiological health in humans (Mahoney, 2010). When rats are chronically  
20 deprived of sleep there are detrimental effects on longevity (Rechtschaffen, Gilliland, Bergmann, &  
21 Winter, 1983), skin condition (Everson, Bergmann, & Rechtschaffen, 1989) and body weight  
22 (Everson & Szabo, 2011) accompanied by physiological changes in internal organs (Everson &  
23 Szabo, 2009). Thus, sleep positively influences many organ systems in addition to the nervous  
24 system.

25 The genetically tractable model organism *Drosophila melanogaster* exhibits several characteristics of  
26 mammalian sleep – increased arousal threshold, site-specificity, regulation by homeostatic and

27 circadian clock mechanisms and even sleep-specific electrophysiological signatures (Hendricks et al.,  
28 2000; Nitz, van Swinderen, Tononi, & Greenspan, 2002; Shaw, Cirelli, Greenspan, & Tononi, 2000;  
29 van Alphen, Yap, Kirszenblat, Kottler, & van Swinderen, 2013). Sleep deprivation in flies results in  
30 deleterious effects similar to those seen in mammals. Mechanically depriving flies of sleep decreases  
31 their lifespan (Seugnet et al., 2009; Shaw, Tononi, Greenspan, & Robinson, 2002) and short-sleeping  
32 mutants of the Shaker potassium channel have reduced lifespan (Bushey, Hughes, Tononi, & Cirelli,  
33 2010; Cirelli et al., 2005). However, lifespan by itself is an insufficient indicator of overall fitness of  
34 an organism as it can be radically influenced by reproductive output (Sheeba, Sharma, Shubha,  
35 Chandrashekar, & Joshi, 2000). Since reproductive success is a strong evolutionary driving force,  
36 we focused on possible mechanistic links between sleep and reproductive output.

37 In humans, infertility is often associated with sleep disturbances; however, the complexity of the  
38 reproductive system and sleep characteristics in humans makes the analysis of sleep disruption  
39 affecting reproductive processes difficult (Kloss, Perlis, Zamzow, Culnan, & Gracia, 2015). Shift-  
40 workers and women who experience frequent jet lag conditions report sleep disturbances and  
41 abnormal menstrual cycles and are at a higher risk of developing pregnancy-related complications  
42 (Mahoney, 2010). Chronic sleep deprivation in rats increases spontaneous ejaculations (Andersen &  
43 Tufik, 2002) and reduces the number of live sperm (Alvarenga, Hirotsu, Mazaro-Costa, Tufik, &  
44 Andersen, 2015). In mice subjected to light protocols mimicking jet lag and circadian misalignment,  
45 reproductive success is hampered (Summa, Vitaterna, & Turek, 2012). Circadian clock mutants with  
46 defective timing and consolidation of sleep also have reduced reproductive output in flies (Beaver et  
47 al., 2002) and mice (Loh et al., 2014). Sleep deprivation alters aggressive behaviour in flies and  
48 hampers the chances of mating (Kayser, Mainwaring, Yue, & Sehgal, 2015). Most studies show that  
49 sleep and reproductive output are associated with one another, without testing the direct effects of  
50 sleep on reproductive success. Here, we address this question by impairing sleep in female fruit flies  
51 and testing its effect on reproductive output. We find that feeding flies with caffeine or depriving  
52 them of sleep by mechanical perturbation, or by decreasing sleep by genetic activation of wake-  
53 promoting dopamine neurons all result in decreased egg output. Decreased sleep is associated with

54 decreased egg output for all manipulations. Thus, our study establishes a model system to study the  
55 mechanisms underlying relationships between sleep and reproductive processes that underlie fitness.

## 56 **Results**

57 **Effect of sleep deprivation on egg output of inbred  $w^{1118}$  flies.** To assess the impact of sleep  
58 deprivation upon reproductive output, we first used caffeine to deprive female flies of sleep. Flies  
59 were given caffeinated food during the day only ( $D_{caf}$ ), or during the night only ( $N_{caf}$ ) or standard  
60 cornmeal food during both day and night that acted as controls (Ctrl). To estimate the appropriate  
61 concentration of caffeine for our egg output assay, we quantified the amount of sleep loss in flies with  
62 two concentrations (0.5 and 1 mg/ml) based on previous studies (Andreatic, Kim, Jones, Han, &  
63 Greenspan, 2008; Wu et al., 2009) and our pilot experiments. Flies that were fed with food containing  
64 0.5 mg/ml caffeine only during the day ( $D_{caf}$ ) tend to exhibit less sleep during the day as compared to  
65 their own baseline (BS) as well as compared to control flies during caffeine (CAF) days (Fig 1A, BS  
66 and CAF), although this reduction was not statistically significant (Fig 1B, day). However, these flies  
67 showed a rebound increase in daytime sleep upon removal from caffeinated food (Fig 1A, RC) which  
68 was significantly higher than daytime sleep during BS and CAF (Fig 1B, day). Similarly, when flies  
69 were fed with food containing 0.5 mg/ml caffeine only during the night ( $N_{caf}$ , Fig 1A-B), their night  
70 sleep was significantly reduced as compared to their own BS days as well as control flies during CAF  
71 days (Fig 1A, BS and CAF; Fig 1B, night). These data show that caffeine has an immediate effect on  
72 sleep –  $D_{caf}$  flies show reduced daytime sleep while  $N_{caf}$  flies show reduced night sleep. We found  
73 similar trends of reduced daytime sleep of  $D_{caf}$  and reduced night sleep of  $N_{caf}$  with respect to BS  
74 when flies were fed with food containing 1 mg/ml caffeine (Supplementary Fig 1). Importantly, 0.5  
75 mg/ml is more efficient in decreasing sleep levels (53% day and 49% night sleep loss) as compared  
76 to 1.0 mg/ml of caffeine (38 % day and 4 % night sleep loss, Fig 1B'). This may be due to reduced  
77 food intake with increasing caffeine content, which could in turn result in lesser extent of sleep loss.

78 Since providing flies with food containing 0.5 mg/ml caffeine during day or night leads to about 50 %  
79 reduction in both daytime and night sleep respectively, we next determined how this affects their

80 reproductive output. We subjected 5-day old female flies (mated for one day prior to the start of the  
81 experiment) to caffeine treatment only during the day ( $D_{caf}$ ) or only during the night ( $N_{caf}$ ). We found  
82 that both  $D_{caf}$  and  $N_{caf}$  flies laid lesser number of eggs as compared to the control flies both during the  
83 day as well as night (Fig 1C).  $N_{caf}$  flies laid lesser number of eggs as compared to  $D_{caf}$  flies also,  
84 which was statistically significant on the later days of the treatment (Fig 1C). When we compared the  
85 total number of eggs averaged over the 6 days of treatment,  $D_{caf}$  flies laid significantly lesser number  
86 of eggs as compared to control flies, and  $N_{caf}$  flies laid significantly lesser number of eggs as  
87 compared to both control and  $D_{caf}$  flies (Fig 1C').

88 Since it is likely that flies fed with caffeine laid fewer eggs simply because oviposition was inhibited  
89 by food containing caffeine, we carried out an oviposition preference assay, where flies were allowed  
90 to lay eggs on a petri plate, with half the plate containing standard food and the other half containing  
91 0.5 mg/ml caffeinated food. We found that flies laid almost equal number of eggs on both halves,  
92 suggesting that for food containing caffeine at a concentration of 0.5 mg/ml, flies do not have any  
93 ovipositional avoidance (Preference Index  $_{caf} = 0.49 \pm 0.11$ , chi-square test,  $\chi^2 = 0.049$ ,  $p = 0.82$ ).  
94 Overall, these results suggest that caffeine decreases egg output and flies that lose night sleep tend to  
95 lay lesser number of eggs than flies that lose daytime sleep.

96 To confirm the effect of sleep loss in egg output we used a completely different sleep deprivation  
97 method. We substituted caffeine with a vortexer-based mechanical perturbation protocol. Three sets  
98 of flies received either of the following treatments – exposure to mechanical disturbance only during  
99 day ( $D_{dep}$ ), or only during night ( $N_{dep}$ ) or control (Ctrl) condition with no mechanical perturbation.  
100 For the same sets of flies, we obtained both sleep levels and egg counts by transferring flies to fresh  
101 tubes every 12 hours for five days. As expected, mechanical disturbance during day reduced daytime  
102 sleep and that during night reduced night sleep drastically (Fig 1D-F). However, only  $N_{dep}$  flies  
103 recovered this lost night sleep during the subsequent days (Fig 1E) whereas  $D_{dep}$  flies did not recover  
104 the lost daytime sleep during subsequent nights (Fig 1F). Nevertheless,  $N_{dep}$  flies lost greater amount  
105 of overall sleep as compared to  $D_{dep}$  flies (Fig 1G). Importantly, the average egg output in both  $D_{dep}$   
106 and  $N_{dep}$  flies was significantly lowered as compared to the control flies (Fig 1H). Furthermore,  $N_{dep}$

107 flies, which on average lost more sleep, also laid significantly lesser number of eggs as compared to  
108  $D_{dep}$  flies (Fig 1G-H). Thus, these results along with similar results obtained with sleep deprivation  
109 using caffeine suggest that sleep loss results in reduction in egg output and that sleep loss during the  
110 night has a greater detrimental effect on egg output.

111 **Effect of sleep deprivation on reproductive fitness of outbred flies.** We used a strain of  $w^{1118}$  flies  
112 which has been maintained in our laboratory for several years and is likely to harbour loci that have  
113 been fixed for certain traits which may have resulted in the above phenotype by chance. Given that  
114 reproductive output is a major Darwinian fitness trait, we asked how sleep loss might affect  
115 reproductive output in a large, random mating and therefore outbred population of flies which is  
116 unlikely to have suffered from similar genetic bottlenecks (CCM) (Gogna, Singh, Sheeba, & Dorai,  
117 2015). We subjected flies to three different concentrations of caffeine (0.5, 1.0 and 1.5 mg/ml) either  
118 only during day or only during night and found that none of the  $D_{caf}$  flies lost daytime sleep, whereas  
119 all the  $N_{caf}$  flies lost similar amounts of night sleep (Fig 2A-B). However,  $D_{caf}$  (1.5 mg/ml) flies laid  
120 significantly lower number of eggs than the control flies, suggesting that caffeine can affect egg  
121 output even without its effect on daytime sleep (Fig 2C). Moreover,  $N_{caf}$  flies receiving 0.5 mg/ml and  
122 1.5 mg/ml caffeine also showed reduced egg output as compared to control flies (Fig 2C). These  
123 results point toward a direct effect of caffeine on egg output independent of its effect on sleep as well  
124 as an indirect effect on egg output through sleep loss. To probe this further, we increased caffeine  
125 concentration and found that even higher caffeine concentrations of 4.0 mg/ml fed during the day did  
126 not affect daytime sleep (Supplementary Fig 2A-BS and CAF, 2B, day), however, when fed during  
127 the night, decreased night sleep (Supplementary Fig 2B, night). With respect to egg output, we found  
128 that the total number of eggs laid by  $D_{caf}$  and  $N_{caf}$  flies was significantly lower than that of the control  
129 flies, however, the number of eggs laid by  $D_{caf}$  and  $N_{caf}$  flies were not statistically different from each  
130 other (Supplementary Fig 2C) similar to what was found for lower concentrations of caffeine.  
131 Caffeine treatment does not affect the viability of the eggs laid as seen from egg-to-adult survivorship  
132 of eggs laid by  $D_{caf}$ ,  $N_{caf}$  (0.5 mg/ml) and Ctrl flies (data not shown). Taken together, these results

133 suggest that caffeine treatment may affect the reproductive fitness directly or indirectly through sleep  
134 loss.

135 We next subjected the CCM flies to sleep deprivation protocol using mechanical perturbation either  
136 during the day only ( $D_{dep}$ ) or during the night only ( $N_{dep}$ ). Expectedly,  $D_{dep}$  flies lost day sleep and  
137  $N_{dep}$  flies lost night sleep which they could recover during subsequent days (Fig 2D-F). Nevertheless  
138  $N_{dep}$  flies lost overall greater amount of sleep as compared to  $D_{dep}$  flies (Fig 2G). Again, as in the case  
139 of caffeine fed outbred flies, with mechanical disturbance also we found that there is a reduction in  
140 egg output in  $D_{dep}$  and  $N_{dep}$  flies as compared to control flies, although there was no difference in egg  
141 output between flies experiencing day vs. night sleep disturbance (Fig 2H). However, in yet another  
142 assay with mechanically sleep deprived flies, egg output of  $N_{dep}$  flies averaged across three days *after*  
143 the deprivation protocol was still significantly reduced, while that of  $D_{dep}$  flies was comparable to  
144 control flies (Supplementary Fig 3). Therefore, with both caffeine and mechanical disturbance, the  
145 resultant sleep deprivation contributed in part to the decrease in egg output of outbred flies.  
146 Furthermore, as seen in inbred flies, night sleep loss had greater impact on egg output as compared to  
147 daytime sleep loss, though this difference was less discernible and the effect much more subtle in  
148 outbred flies.

149 **Transient sleep reduction is accompanied by transient reduction in egg output.** It is possible that  
150 both caffeine feeding and mechanical perturbation could have broad effects on general physiology of  
151 the fly. Therefore, we used a third genetic method whereby sleep reduction is transient and measured  
152 egg output following neural-circuit-driven sleep loss. We used the GAL4-UAS system to express a  
153 temperature-sensitive cation channel *Drosophila* Transient Receptor Potential 1 [*dTRPA1*, which  
154 opens above temperatures of 27 °C and causes hyper-excitation (Hamada et al., 2008)], in  
155 dopaminergic neurons that have previously been shown to be wake-promoting (Liu, Liu, Kodama,  
156 Driscoll, & Wu, 2012; Shang et al., 2011; Ueno et al., 2012). We recorded sleep levels of flies in  
157 tubes and egg output in vials exposed to the following regime – two days at 21 °C followed by three  
158 days at 28 °C followed by a day at 21 °C under LD 12:12. As expected, at the higher temperature,  
159 sleep was reduced both during daytime and night when dopaminergic neurons were activated,

160 whereas the baseline sleep levels of these experimental flies were not different from that of the  
161 parental controls at the lower temperature (Fig 3A-B). The number of eggs laid by the experimental  
162 flies was significantly lower than that of the controls (Fig 3C). Indeed, these differences in egg output  
163 between experimental and control flies were not seen at the lower temperature of 21 °C (Fig 3C)  
164 when sleep levels were not affected (Fig 3A-B), suggesting that transiently reducing sleep levels by  
165 activating wake-promoting neurons also resulted in transient reduction of egg output. Taken together,  
166 our results suggest that sleep loss leads to reduction in egg output, irrespective of the method of sleep  
167 deprivation.

168 **Dopamine transporter mutants show reduced sleep but not reduced egg output in response to**  
169 **caffeine.** Given that increasing dopaminergic activity increases wakefulness and decreases egg  
170 output, we asked if increasing the amount of dopamine in synaptic clefts also led to decreased egg  
171 output. We used flies with loss-of-function mutation in the *fumin* (*fmn*) gene, which codes for  
172 dopamine transporter. Mutant *fmn* flies have been reported to show overall reduced sleep and no  
173 reduction in lifespan, but the authors did not measure fertility in their study (Kume, Kume, Park,  
174 Hirsh, & Jackson, 2005). We quantified their egg output along with sleep levels and found that the  
175 *fmn* flies expectedly showed reduced sleep levels both during the day and night (Fig 4A-B-top), and  
176 the egg output of *fmn* flies was drastically reduced as compared to that of the background control flies  
177 (*fmn-bg*, Fig 4C). Once again, we find that flies that sleep less also have low egg output.

178 A previous study has shown that *fmn* mutants show a further reduction in sleep when fed with caffeine  
179 (Andretic, et al., 2008). We asked if the egg output is also further reduced in *fmn* flies fed with  
180 caffeine compared to those fed with standard food. We fed *fmn* and *fmn-bg* flies with 0.5 mg/ml  
181 caffeine either only during the day or night and found that N<sub>caf</sub> flies of both *fmn* and *fmn-bg* genotypes  
182 show reduced levels of night sleep as compared to their respective controls (Fig 4B, night), whereas  
183 D<sub>caf</sub> flies of both genotypes show reduced levels of daytime sleep (Fig 4B, day), even though it does  
184 not reach statistical significance. Interestingly, just like the previously used inbred flies of the *w*<sup>1118</sup>  
185 genotype, the *fmn-bg* which are flies from another inbred line show a statistically significant trend of  
186 decreasing number of eggs laid by Ctrl, D<sub>caf</sub> and N<sub>caf</sub> flies, in that order (Fig 4C). However,



187 surprisingly, flies of the *fmn* genotype receiving the Ctrl, D<sub>caf</sub> or N<sub>caf</sub> treatments did not differ in the  
188 average number of eggs laid (Fig 4C). This suggests that while sleep is affected by caffeine treatment  
189 in *fmn* flies, egg output is not, suggesting that egg output cannot be reduced by caffeine beyond a  
190 threshold. Alternatively, the *fmn* gene may be involved in caffeine-mediated egg output reduction  
191 independent of the caffeine-mediated sleep loss.

## 192 **Discussion**

193 Our study aimed to understand how sleep affects reproductive output in female fruit flies *Drosophila*  
194 *melanogaster*. We find that feeding flies with caffeine such that it reduces sleep also reduces egg  
195 output in both inbred and outbred strains of flies (Figs 1, 2). Moreover, depriving flies of sleep via  
196 mechanical perturbation also reduces egg output considerably (Figs 1, 2). A loss-of-function mutation  
197 in dopamine transporter gene that results in reduced sleep (Kume, et al., 2005) also results in reduced  
198 egg output (Fig 4). Most importantly, reducing sleep by transient dopaminergic neuronal activation  
199 reduces egg output; removal of this activation results in wild type levels of sleep and egg output (Fig  
200 3). Thus, these results strongly indicate that it is sleep loss which has a direct detrimental impact on  
201 reproductive output. While it is possible that three distinct methods of sleep deprivation all cause a  
202 direct negative impact on egg output independent of sleep loss, we feel that it is unlikely, especially  
203 considering the transient nature of the genetic manipulation induced sleep loss. To our knowledge,  
204 this is the first study to establish a direct link between sleep and reproductive physiology in  
205 *Drosophila melanogaster*.

206 Reproduction in *Drosophila* is regulated by an array of hormones and fecundity critically depends  
207 upon balance in the amounts of Juvenile Hormone (JH) and ecdysone (20E) (Soller, Bownes, &  
208 Kubli, 1999). Dopamine regulates levels of JH in *Drosophila viridis* (Rauschenbach et al., 2007)  
209 thereby indirectly affecting fecundity. Indeed, dopaminergic neuronal circuits are involved in  
210 governing oviposition choice, specifically to media containing favourable levels of alcohol (Azanchi,  
211 Kaun, & Heberlein, 2013). Moreover, it has been also shown that dopamine acts to promote  
212 adaptation of *Drosophila sechelia* to a specialist diet of an otherwise toxic fruit, *Morinda citrifolia* by

213 boosting its fecundity (Lavista-Llanos et al., 2014). In a recent study using genome-wide association  
214 methods, two genes encoding dopamine receptors (*Dop1R1* and *DopEcR*) in *D. melanogaster* were  
215 shown to have pleiotrophic effects on traits associated with ovariole number and sleep parameters  
216 (Lobell, Kaspari, Serrano Negron, & Harbison, 2017). Importantly, lowered levels of dopamine  
217 during larval stages or immediately after eclosion both have far reaching consequences in terms of  
218 decreased egg output and stalled ovarian development respectively (Neckameyer, 1996). In contrast,  
219 we show that a loss-of-function mutation in the dopamine transporter gene which retains dopamine in  
220 synaptic clefts reduces sleep and reduces egg output while transient *increase* in dopaminergic activity  
221 causes a transient decrease in both sleep and egg output (Fig 3). Together these results demonstrate  
222 that levels of neuromodulatory substances can have strong dose dependent effects such that both low  
223 and high titres can lead to sub-optimal outcomes to the organism (Berridge & Arnsten, 2013).

224 Caffeine is one of the most widely used psychostimulants in the world and it promotes wakefulness  
225 and causes sleep deprivation. With increased precedence in shift work and a general lifestyle  
226 favouring delayed bedtimes and decreased night sleep levels, the consumption of caffeine specifically  
227 during the night is bound to increase. Here, we show that caffeine consumption and increased night  
228 activity decreases sleep and negatively alters egg output in *Drosophila*. While we have shown this  
229 effect with female flies, it is not wrong to expect similar trends in male reproductive output as well.  
230 In conclusion, our results unequivocally show that each method of sleep deprivation, be it chemical,  
231 mechanical or genetic, results in sleep loss accompanied with reduction in egg output. For animals  
232 that invest in parental care, sleep deprivation may be an inevitable consequence resulting in lowered  
233 reproductive output thereby potentially giving rise to a subtle level of parent-offspring conflict or co-  
234 adaptation. We conclude that sleep may contribute to reproductive success of organisms, thereby  
235 amplifying its propensity to be selected for, over evolutionary timescales.

## 236 **Materials and Methods**

237 **Fly strains.** Fly strains used for both activity/rest and egg output assays were *w*<sup>1118</sup> (Bloomington  
238 stock # 5905), *fumin* (*fmn*), 2202CS (background control for *fmn* flies, henceforth referred to as *fmn*-

239 *bg*), *TH GAL4*, *UAS dTRPA1* and previously described outbreeding population Chrono Control  
240 Merged [CCM, (Gogna, et al., 2015)]. *Fmn* and *fmn-bg* flies were gifts from Dr. Kazuhiko Kume,  
241 Nagoya city University, Nagoya, Japan. Other fly lines were obtained from the Bloomington stock  
242 centre, Bloomington, Indiana. All the transgenic flies used were back-crossed into the standard *w*<sup>1118</sup>  
243 background for at least 7 generations.

244 **Activity/rest and egg output assays.** For the activity/rest assays, 4-5 day old virgin female flies  
245 were initially allowed to mate for a day and then were individually housed in tubes (65 mm length, 3  
246 mm diameter) with standard cornmeal food on one end and cotton plug on the other and activity was  
247 recorded in DAM2 monitors (*Drosophila* activity monitoring system, Trikinetics, Waltham,  
248 Massachusetts, USA). The DAM system works on the standard beam-breaking principle where a fly  
249 cuts an infra-red beam whenever it moves in the middle portion of the tube, thereby generating  
250 activity counts. Activity counts were binned at 1 min intervals to obtain sleep parameters using the  
251 software PySolo (Gilestro & Cirelli, 2009). Flies were housed in light and temperature controlled  
252 environments with 12 hours of light and 12 hours of darkness (LD 12:12) at 25 °C using incubators  
253 (MIR-273, Sanyo, Japan; DR-36VLC8 Percival Scientific Inc., USA). Flies were flipped into tubes  
254 containing either standard food or food containing different concentrations of caffeine (Hi-Media)  
255 every 12 hours depending upon their treatment. The activity recording assays were run for a period of  
256 6-7 days. First two days represent baseline days of recording, next three days (days 3-5) were the  
257 days during which sleep deprivation was given either by caffeine treatment or temperature increase,  
258 and the last two days represent the recovery days during which sleep rebound is expected to occur.  
259 For specific assays, flies were fed with caffeine either during day or night for a period of 6 days.

260 The egg output assays were conducted simultaneously along with the activity/rest assays, on a parallel  
261 set of flies housed in glass vials (10 cm length, 2.5 cm diameter) containing ~3 ml of cornmeal food  
262 with or without caffeine depending upon the treatment. For the egg output assays, a small amount of  
263 charcoal (0.8 g/L) was added to cornmeal food to increase the contrast between eggs and food surface,  
264 thereby aiding in egg counting. As before, flies were transferred into fresh food every 12 h and the  
265 number of eggs laid were counted with the help of a stereo-microscope (Olympus, SZ160). In the

266 experiment for sleep deprivation by mechanical means, individual flies were housed in tubes (65 mm  
267 in length, 5 mm in diameter) placed in DAM5 monitors which were then mounted on a vortexer  
268 (VWR) that was used to mechanically disturb flies either during the day or night. Eggs laid by flies in  
269 these tubes as well as by flies that remained undisturbed throughout day or night were then counted  
270 for a period of 5 days. Oviposition choice assays were performed by introducing 5 female *w<sup>1118</sup>* flies  
271 for a period of two hours on petri-dishes that contained standard cornmeal food on one half and  
272 cornmeal food with specific concentrations of caffeine on the other.

273 **Statistical analysis.** Oviposition preference for a given food was defined as the percentage of total  
274 eggs laid on that food surface. Percentage sleep loss was calculated as percentage decrease in sleep  
275 during sleep deprivation days with reference to, sleep levels during baseline days. Sleep measures of  
276 control and sleep deprived flies were compared using one-way ANOVA with treatment or genotype  
277 as a fixed factor followed by post-hoc Tukey's Honest Significant Difference (HSD) test with *p*-level  
278 set at 0.05. Egg output data were first tested for normality using a Shapiro-Wilk's *W* test. One-way  
279 ANOVA followed by post-hoc Tukey's HSD test was conducted if all datasets under consideration  
280 were normally distributed. However, even if one of the datasets were not normally distributed, a  
281 Kruskal-Wallis test was conducted with *p*-level set at 0.05.

## 282 **Acknowledgments**

283 We thank Todd C. Holmes and Charlotte Helfrich-Forster for helpful comments during writing of the  
284 manuscript. We are grateful to Shambhavi Chidambaram for help with validation of some key results.  
285 We thank Viveka Singh for help with experiments and useful comments on the manuscript. We thank  
286 Rajanna and Muniraju for technical assistance. This work was supported by a research grant  
287 (SB/SO/AS/019/2013) awarded by Science and Engineering Research Board, Department of Science  
288 and Technology, India.

## 289 **Competing interests**

290 The authors declare no conflict of interests.

291 **References**

- 292 Alvarenga, T. A., Hirotsu, C., Mazaro-Costa, R., Tufik, S., & Andersen, M. L. (2015). Impairment of  
293 male reproductive function after sleep deprivation. *Fertil Steril*, *103*(5), 1355-1362 e1351.
- 294 Andersen, M. L., & Tufik, S. (2002). Distinct effects of paradoxical sleep deprivation and cocaine  
295 administration on sexual behavior in male rats. *Addict Biol*, *7*(2), 251-253.
- 296 Andretic, R., Kim, Y. C., Jones, F. S., Han, K. A., & Greenspan, R. J. (2008). Drosophila D1  
297 dopamine receptor mediates caffeine-induced arousal. *Proc Natl Acad Sci U S A*, *105*(51),  
298 20392-20397.
- 299 Azanchi, R., Kaun, K. R., & Heberlein, U. (2013). Competing dopamine neurons drive oviposition  
300 choice for ethanol in Drosophila. *Proc Natl Acad Sci U S A*, *110*(52), 21153-21158.
- 301 Beaver, L. M., Gvakharia, B. O., Vollintine, T. S., Hege, D. M., Stanewsky, R., & Giebultowicz, J. M.  
302 (2002). Loss of circadian clock function decreases reproductive fitness in males of Drosophila  
303 melanogaster. *Proc Natl Acad Sci U S A*, *99*(4), 2134-2139.
- 304 Berridge, C. W., & Arnsten, A. F. (2013). Psychostimulants and motivated behavior: arousal and  
305 cognition. *Neurosci Biobehav Rev*, *37*(9 Pt A), 1976-1984.
- 306 Bushey, D., Hughes, K. A., Tononi, G., & Cirelli, C. (2010). Sleep, aging, and lifespan in Drosophila.  
307 *BMC Neurosci*, *11*, 56.
- 308 Cirelli, C., Bushey, D., Hill, S., Huber, R., Kreber, R., Ganetzky, B., et al. (2005). Reduced sleep in  
309 Drosophila Shaker mutants. *Nature*, *434*(7037), 1087-1092.
- 310 Everson, C. A., Bergmann, B. M., & Rechtschaffen, A. (1989). Sleep deprivation in the rat: III. Total  
311 sleep deprivation. *Sleep*, *12*(1), 13-21.
- 312 Everson, C. A., & Szabo, A. (2009). Recurrent restriction of sleep and inadequate recuperation induce  
313 both adaptive changes and pathological outcomes. *Am J Physiol Regul Integr Comp Physiol*,  
314 *297*(5), R1430-1440.
- 315 Everson, C. A., & Szabo, A. (2011). Repeated exposure to severely limited sleep results in distinctive  
316 and persistent physiological imbalances in rats. *PLoS One*, *6*(8), e22987.

- 317 Gilestro, G. F., & Cirelli, C. (2009). pySolo: a complete suite for sleep analysis in *Drosophila*.  
318 *Bioinformatics*, 25(11), 1466-1467.
- 319 Gogna, N., Singh, V. J., Sheeba, V., & Dorai, K. (2015). NMR-based investigation of the *Drosophila*  
320 *melanogaster* metabolome under the influence of daily cycles of light and temperature. *Mol*  
321 *Biosyst*, 11(12), 3305-3315.
- 322 Hamada, F. N., Rosenzweig, M., Kang, K., Pulver, S. R., Ghezzi, A., Jegla, T. J., et al. (2008). An  
323 internal thermal sensor controlling temperature preference in *Drosophila*. *Nature*, 454(7201),  
324 217-220.
- 325 Hendricks, J. C., Finn, S. M., Panckeri, K. A., Chavkin, J., Williams, J. A., Sehgal, A., et al. (2000).  
326 Rest in *Drosophila* is a sleep-like state. *Neuron*, 25(1), 129-138.
- 327 Kayser, M. S., Mainwaring, B., Yue, Z., & Sehgal, A. (2015). Sleep deprivation suppresses  
328 aggression in *Drosophila*. *Elife*, 4, e07643.
- 329 Kloss, J. D., Perlis, M. L., Zamzow, J. A., Culnan, E. J., & Gracia, C. R. (2015). Sleep, sleep  
330 disturbance, and fertility in women. *Sleep Med Rev*, 22, 78-87.
- 331 Krause, A. J., Simon, E. B., Mander, B. A., Greer, S. M., Saletin, J. M., Goldstein-Piekarski, A. N., et  
332 al. (2017). The sleep-deprived human brain. *Nat Rev Neurosci*, 18(7), 404-418.
- 333 Kume, K., Kume, S., Park, S. K., Hirsh, J., & Jackson, F. R. (2005). Dopamine is a regulator of  
334 arousal in the fruit fly. *J Neurosci*, 25(32), 7377-7384.
- 335 Lavista-Llanos, S., Svatos, A., Kai, M., Riemensperger, T., Birman, S., Stensmyr, M. C., et al. (2014).  
336 Dopamine drives *Drosophila sechellia* adaptation to its toxic host. *Elife*, 3.
- 337 Liu, Q., Liu, S., Kodama, L., Driscoll, M. R., & Wu, M. N. (2012). Two dopaminergic neurons signal  
338 to the dorsal fan-shaped body to promote wakefulness in *Drosophila*. *Curr Biol*, 22(22), 2114-  
339 2123.
- 340 Lobell, A. S., Kaspari, R. R., Serrano Negron, Y. L., & Harbison, S. T. (2017). The Genetic  
341 Architecture of Ovariole Number in *Drosophila melanogaster*: Genes with Major,  
342 Quantitative, and Pleiotropic Effects. *G3 (Bethesda)*.

- 343 Loh, D. H., Kuljis, D. A., Azuma, L., Wu, Y., Truong, D., Wang, H. B., et al. (2014). Disrupted  
344 reproduction, estrous cycle, and circadian rhythms in female mice deficient in vasoactive  
345 intestinal peptide. *J Biol Rhythms*, 29(5), 355-369.
- 346 Mahoney, M. M. (2010). Shift work, jet lag, and female reproduction. *Int J Endocrinol*, 2010, 813764.
- 347 Neckameyer, W. S. (1996). Multiple roles for dopamine in *Drosophila* development. *Dev Biol*,  
348 176(2), 209-219.
- 349 Nitz, D. A., van Swinderen, B., Tononi, G., & Greenspan, R. J. (2002). Electrophysiological  
350 correlates of rest and activity in *Drosophila melanogaster*. *Curr Biol*, 12(22), 1934-1940.
- 351 Rauschenbach, I. Y., Chentsova, N. A., Alekseev, A. A., Gruntenko, N. E., Adonyeva, N. V.,  
352 Karpova, E. K., et al. (2007). Dopamine and octopamine regulate 20-hydroxyecdysone level  
353 in vivo in *Drosophila*. *Arch Insect Biochem Physiol*, 65(2), 95-102.
- 354 Rechtschaffen, A., Gilliland, M. A., Bergmann, B. M., & Winter, J. B. (1983). Physiological  
355 correlates of prolonged sleep deprivation in rats. *Science*, 221(4606), 182-184.
- 356 Seugnet, L., Suzuki, Y., Thimgan, M., Donlea, J., Gimbel, S. I., Gottschalk, L., et al. (2009).  
357 Identifying sleep regulatory genes using a *Drosophila* model of insomnia. *J Neurosci*, 29(22),  
358 7148-7157.
- 359 Shang, Y., Haynes, P., Pirez, N., Harrington, K. I., Guo, F., Pollack, J., et al. (2011). Imaging analysis  
360 of clock neurons reveals light buffers the wake-promoting effect of dopamine. *Nat Neurosci*,  
361 14(7), 889-895.
- 362 Shaw, P. J., Cirelli, C., Greenspan, R. J., & Tononi, G. (2000). Correlates of sleep and waking in  
363 *Drosophila melanogaster*. *Science*, 287(5459), 1834-1837.
- 364 Shaw, P. J., Tononi, G., Greenspan, R. J., & Robinson, D. F. (2002). Stress response genes protect  
365 against lethal effects of sleep deprivation in *Drosophila*. *Nature*, 417(6886), 287-291.
- 366 Sheeba, V., Sharma, V. K., Shubha, K., Chandrashekar, M. K., & Joshi, A. (2000). The effect of  
367 different light regimes on adult life span in *Drosophila melanogaster* is partly mediated  
368 through reproductive output. *J Biol Rhythms*, 15(5), 380-392.
- 369 Soller, M., Bownes, M., & Kubli, E. (1999). Control of oocyte maturation in sexually mature  
370 *Drosophila* females. *Dev Biol*, 208(2), 337-351.

371 Summa, K. C., Vitaterna, M. H., & Turek, F. W. (2012). Environmental perturbation of the circadian  
372 clock disrupts pregnancy in the mouse. *PLoS One*, 7(5), e37668.

373 Ueno, T., Tomita, J., Tanimoto, H., Endo, K., Ito, K., Kume, S., et al. (2012). Identification of a  
374 dopamine pathway that regulates sleep and arousal in *Drosophila*. *Nat Neurosci*, 15(11),  
375 1516-1523.

376 van Alphen, B., Yap, M. H., Kirszenblat, L., Kottler, B., & van Swinderen, B. (2013). A dynamic  
377 deep sleep stage in *Drosophila*. *J Neurosci*, 33(16), 6917-6927.

378 Wu, M. N., Ho, K., Crocker, A., Yue, Z., Koh, K., & Sehgal, A. (2009). The effects of caffeine on  
379 sleep in *Drosophila* require PKA activity, but not the adenosine receptor. *J Neurosci*, 29(35),  
380 11029-11037.

### 381 **Figure legends**

382 **Figure 1. Sleep deprivation by caffeine and mechanical disturbance of  $w^{1118}$  flies results in**  
383 **decrease of egg output** (A) Sleep in minutes for every half hour over a period of 24 h is shown for  
384  $w^{1118}$  flies fed with standard food (Ctrl,  $n = 28$ ), flies fed with 0.5 mg/ml caffeine only during the day  
385 ( $D_{caf}$ ,  $n = 25$ ) and only during the night ( $N_{caf}$ ,  $n = 24$ ) averaged across two baseline (BS), three  
386 caffeine feeding (CAF) and two recovery (RC) days. Horizontal white and black bars on top  
387 represent day and night respectively. (B) Daytime (top) and night (bottom) sleep of control,  $D_{caf}$  and  
388  $N_{caf}$  flies are compared across BS, CAF and RC days.  $D_{caf}$  flies show significant increase in daytime  
389 sleep during RC days as compared to that during BS and CAF days.  $N_{caf}$  flies show significantly  
390 lower levels of night sleep during CAF days as compared to that during BS and RC days, as well as  
391 night sleep of controls during CAF days (two-way ANOVA with treatment and days as fixed factors  
392 followed by post-hoc Tukey's HSD test). (B') Percentage total sleep loss during CAF days with  
393 respect to BS days plotted as function of caffeine concentration shows that sleep loss is higher for  
394 caffeine concentration of 0.5 mg/ml during both day and night as compared to a concentration of 1.0  
395 mg/ml. (C) Number of eggs laid by control ( $n = 25$ ),  $D_{caf}$  ( $n = 24$ ) and  $N_{caf}$  ( $n = 25$ ) flies both during  
396 day and night over a period of six days of caffeine (0.5 mg/ml) treatment. \* denotes significant  
397 differences between either  $D_{caf}$  or  $N_{caf}$  with control flies, while # indicates significant differences



398 between  $D_{caf}$  and  $N_{caf}$  flies (Kruskal-Wallis test). (C') Total number of eggs laid averaged across six  
399 days of caffeine treatment.  $D_{caf}$  flies laid significantly lesser number of eggs as compared to control  
400 flies, while  $N_{caf}$  flies lay significantly lower number of eggs as compared to both control and  $D_{caf}$  flies  
401 (one-way ANOVA with treatment as fixed factor followed by post-hoc Tukey's HSD test). The  
402 experiment was repeated with similar results (data not shown). (D) Sleep in minutes for every half  
403 hour over a period of 24 h averaged across 5 days is shown for control  $w^{1118}$  flies (Ctrl,  $n = 26$ ), flies  
404 receiving mechanical disturbance only during the day ( $D_{dep}$ ,  $n = 28$ ) and only during the night ( $N_{dep}$ ,  $n$   
405  $= 27$ ). (E) Daytime sleep of  $D_{dep}$  flies significantly reduced as compared to Ctrl and  $N_{dep}$ , whereas that  
406 of  $N_{dep}$  flies significantly higher than that of Ctrl and  $D_{dep}$ . (F) Night sleep of  $N_{dep}$  flies significantly  
407 lower than Ctrl and  $D_{dep}$  flies. (G) Total sleep of  $D_{dep}$  flies is significantly lower than Ctrl and that of  
408  $N_{dep}$  flies is significantly lower than Ctrl and  $D_{dep}$  flies (one way ANOVA with treatment as fixed  
409 factor followed by post-hoc Tukey's HSD test for E, F and G). (H) Total number of eggs laid by Ctrl,  
410  $D_{dep}$  and  $N_{dep}$  flies averaged across 5 days.  $D_{dep}$  flies show significant reduction in number of eggs  
411 laid as compared to Ctrl;  $N_{dep}$  flies laid even lower number of eggs significantly reduced as compared  
412 to both Ctrl and  $D_{dep}$  flies (Kruskal-Wallis test). \*  $p < 0.05$ , \*\*  $p < 0.005$ , \*\*\*  $p < 0.0005$ . Error bars  
413 are SEM.

414 **Figure 2. Sleep deprivation by caffeine and mechanical disturbance of outbred CCM flies**  
415 **results in egg output reduction** (A) Daytime and (B) night sleep of flies of outbred CCM population  
416 fed with standard food, or caffeine food of different concentrations (0.5, 1.0 and 1.5 mg/ml) either  
417 only during day ( $D_{caf}$ ) or only during night ( $N_{caf}$ ). Daytime sleep of flies receiving all the treatments is  
418 similar, while night sleep of  $N_{caf}$  flies of all caffeine concentrations is significantly reduced as  
419 compared to control and  $D_{caf}$  flies of all caffeine concentrations (one -way ANOVA with treatment as  
420 fixed factor followed by post-hoc Tukey's HSD test).  $n \geq 21$  for all treatments. (C) Total number of  
421 eggs laid averaged across 6 days by  $D_{caf}$ -1.5 ( $n = 13$ ),  $N_{caf}$ -0.5 ( $n = 19$ ) and  $N_{caf}$ -1.5 ( $n = 17$ ) flies are  
422 significantly reduced as compared to the control ( $n = 16$ ) flies.  $D_{caf}$  and  $N_{caf}$  flies of any caffeine  
423 concentration do not differ in the total number of eggs laid from each other.  $D_{caf}$ -0.5 ( $n = 17$ ),  $D_{caf}$ -1.0  
424 ( $n = 17$ ) and  $N_{caf}$ -1.0 ( $n = 18$ ) do not differ from the control flies in the number of eggs laid (Kruskal-

425 Wallis test). (D) Sleep in minutes for every half hour over a period of 24 h averaged across five days  
426 is shown for control ( $n = 28$ ) flies of outbred CCM population, flies mechanically disturbed during the  
427 day ( $D_{\text{dep}}$ ,  $n = 30$ ) and during the night ( $N_{\text{dep}}$ ,  $n = 31$ ). (E) During the day,  $D_{\text{dep}}$  flies sleep significantly  
428 lower than both control and  $N_{\text{dep}}$  flies due to mechanical disturbance,  $N_{\text{dep}}$  flies sleep significantly  
429 higher than control and  $D_{\text{dep}}$  flies indicating sleep rebound due to sleep deprivation during the  
430 previous night. (F) During the night,  $N_{\text{dep}}$  flies sleep significantly lower than the control and  $D_{\text{dep}}$  flies  
431 due to mechanical perturbation. (G) Total sleep averaged across 5 days of  $D_{\text{dep}}$  flies is significantly  
432 lower than control flies, whereas that of  $N_{\text{dep}}$  is significantly lower than both control and  $D_{\text{dep}}$  flies  
433 (one-way ANOVA with treatment as fixed factor followed by post-hoc Tukey's HSD test for E, F and  
434 G). (H) Total number of eggs laid averaged across five days by both  $D_{\text{dep}}$  and  $N_{\text{dep}}$  flies is  
435 significantly lower as compared to control flies (Kuskal-Wallis test). All other details as in Figure 1.  
436 A similar experiment with higher levels of deprivation yielded similar results (data not shown).

437 **Figure 3. Decreasing sleep levels using dTRPA1-based reversible activation of dopaminergic**  
438 **neurons reversibly decreases egg output** (A) Sleep in minutes for every half hour over a period of  
439 24 h averaged across two days at 21 °C (left) and three days at 28 °C (right) is shown for *UAS*  
440 *dTRPA1/+* ( $n = 29$ ), *TH GAL4/+* ( $n = 28$ ) and *TH GAL4 > UAS dTRPA1* ( $n = 32$ ) flies. (B) At 21 °C,  
441 total sleep levels of all three genotypes is similar, whereas at 28 °C, *TH GAL4 > UAS dTRPA1* flies  
442 sleep significantly lower than *UAS dTRPA1/+* and *TH GAL4/+* flies (two-way ANOVA with  
443 genotype and temperature as fixed factors followed by post-hoc Tukey's HSD test). (C) Total number  
444 of eggs laid averaged across two days at 21 °C (left) is similar across all genotypes, while average  
445 number of eggs laid by *TH GAL4 > UAS dTRPA1* ( $n = 16$ ) flies is significantly lower than *UAS*  
446 *dTRPA1/+* ( $n = 16$ ) and *TH GAL4/+* ( $n = 19$ ) flies during the three days at 28 °C (right, Kruskal-  
447 Wallis test). All other details as in Figure 1.

448 **Figure 4. *fmn* flies reduce sleep but not egg output in response to caffeine** (A) Sleep in minutes  
449 for every half hour over a period of 24 h averaged across 6 days of *fmn* and *fmn* background control  
450 (*fmn-bg*) flies (top), *fmn-bg* flies fed with standard food ( $n = 17$ ), caffeine food (0.5 mg/ml) only

451 during the day ( $D_{caf}$ ,  $n = 28$ ) and only during the night ( $N_{caf}$ ,  $n = 26$ ) (middle) and *fmn* receiving  
452 control ( $n = 22$ ),  $D_{caf}$  ( $n = 24$ ) and  $N_{caf}$  ( $n = 28$ ) treatments (bottom). (B) Total sleep levels of *fmn-bg*  
453 and *fmn* flies, compared with that of  $D_{caf}$  and  $N_{caf}$  flies of each genotype (top), daytime sleep (middle)  
454 and night sleep (bottom). *fmn* flies sleep significantly lower than the *fmn-bg* flies both during the day  
455 and night, thereby leading to overall reduced levels of sleep. Daytime sleep of  $D_{caf}$  and  $N_{caf}$  flies of  
456 the control genotype are significantly different from one another, whereas night sleep of  $N_{caf}$  flies is  
457 significantly lower than  $D_{caf}$  and control flies of the *fmn-bg* genotype. Night sleep of  $N_{caf}$  flies is  
458 significantly lower than both control and  $D_{caf}$  flies of the *fmn* genotype (two-way ANOVA with  
459 genotype and treatment as fixed factors followed by post-hoc Tukey's HSD test). (C) Total number  
460 of eggs laid averaged over 6 days by *fmn* flies is significantly lower than that of *fmn-bg* flies  
461 (Students' two-tailed *t* test).  $D_{caf}$  flies of *fmn-bg* genotype ( $n = 14$ ) laid significantly lower number of  
462 eggs as compared to its controls ( $n = 14$ ), while  $N_{caf}$  flies of *fmn-bg* genotype ( $n = 16$ ) laid  
463 significantly lower number of eggs as compared to both control and  $D_{caf}$  flies. Control ( $n = 15$ ),  $D_{caf}$   
464 ( $n = 17$ ) and  $N_{caf}$  ( $n = 17$ ) flies of the *fmn* genotype laid similar number of eggs (two-way ANOVA  
465 with genotype and treatment as fixed factors followed by post-hoc Tukey's HSD test). All other  
466 details as in Figure 1.

## 467 **Supplementary Information**

468 **Supplementary Figure 1.** (A) Sleep in minutes for every half hour over a period of 24 h is shown for  
469  $w^{1118}$  flies fed with standard food (Ctrl,  $n = 28$ ), flies fed with 1.0 mg/ml caffeine only during the day  
470 ( $D_{caf}$ ,  $n = 29$ ) and only during the night ( $N_{caf}$ ,  $n = 28$ ) averaged across two baseline (BS), three  
471 caffeine feeding (CAF) and two recovery (RC) days. (B) Daytime (top) and night (bottom) sleep of  
472 control,  $D_{caf}$  and  $N_{caf}$  flies are compared across BS, CAF and RC days. Only night sleep of  $N_{caf}$  flies  
473 during CAF and RC days is significantly different from each other (two-way ANOVA with treatment  
474 and days as fixed factors followed by post-hoc Tukey's HSD test). All other details as in Figure 1.

475 **Supplementary Figure 2.** (A) Sleep in minutes for every half hour over a period of 24 h is shown for  
476 control flies of outbred CCM population fed with standard food (Ctrl,  $n = 16$ ), flies fed with caffeine

477 only during the day ( $D_{caf}$ ,  $n = 16$ ) and only during the night ( $N_{caf}$ ,  $n = 14$ ) for caffeine concentration of  
478 4.0 mg/ml averaged across two baseline (BS), three caffeine feeding (CAF) and two recovery (RC)  
479 days. Night sleep of  $N_{caf}$  flies during CAF days is lower than that of controls, and both daytime and  
480 night sleep of  $N_{caf}$  flies is higher than the controls during RC. (B) Daytime sleep levels of control and  
481  $D_{caf}$  flies show no differences across different days, whereas those of control and  $N_{caf}$  flies  
482 significantly differ from each other during RC. Daytime sleep of  $N_{caf}$  flies during RC is significantly  
483 higher than that during BS. Night sleep of  $N_{caf}$  flies during CAF and RC days are significantly  
484 different from each other other (two-way ANOVA with treatment and days as fixed factors followed  
485 by post-hoc Tukey's HSD test). (C) Total eggs laid by control ( $n = 16$ ),  $D_{caf}$  ( $n = 14$ ) and  $N_{caf}$  ( $n = 18$ )  
486 flies averaged across six days of caffeine feeding. Control flies laid higher number of eggs as  
487 compared to both  $D_{caf}$  and  $N_{caf}$  flies (Kruskal-Wallis test). All other details as in Figure 1.

488 **Supplementary Figure 3.** (A) Total sleep (top) during 6 days of sleep deprivation and (bottom)  
489 averaged for 3 days post-deprivation. Sleep of  $N_{dep}$  ( $n = 16$ ) flies is significantly lower than both  
490 control ( $n = 29$ ) and  $D_{dep}$  ( $n = 21$ ) flies during sleep deprivation, whereas both  $D_{dep}$  and  $N_{dep}$  flies sleep  
491 more after deprivation (one-way ANOVA followed by post-hoc Tukey's HSD test). (B) Average  
492 number of eggs laid (top) during sleep deprivation and (bottom) after sleep deprivation.  $D_{dep}$  and  $N_{dep}$   
493 flies lay lesser number of eggs as compared to control flies during deprivation, but only  $N_{dep}$  flies lay  
494 lower number of eggs compared to control flies after deprivation (Kruskal-Wallis tests). All other  
495 details as in Figure 1.

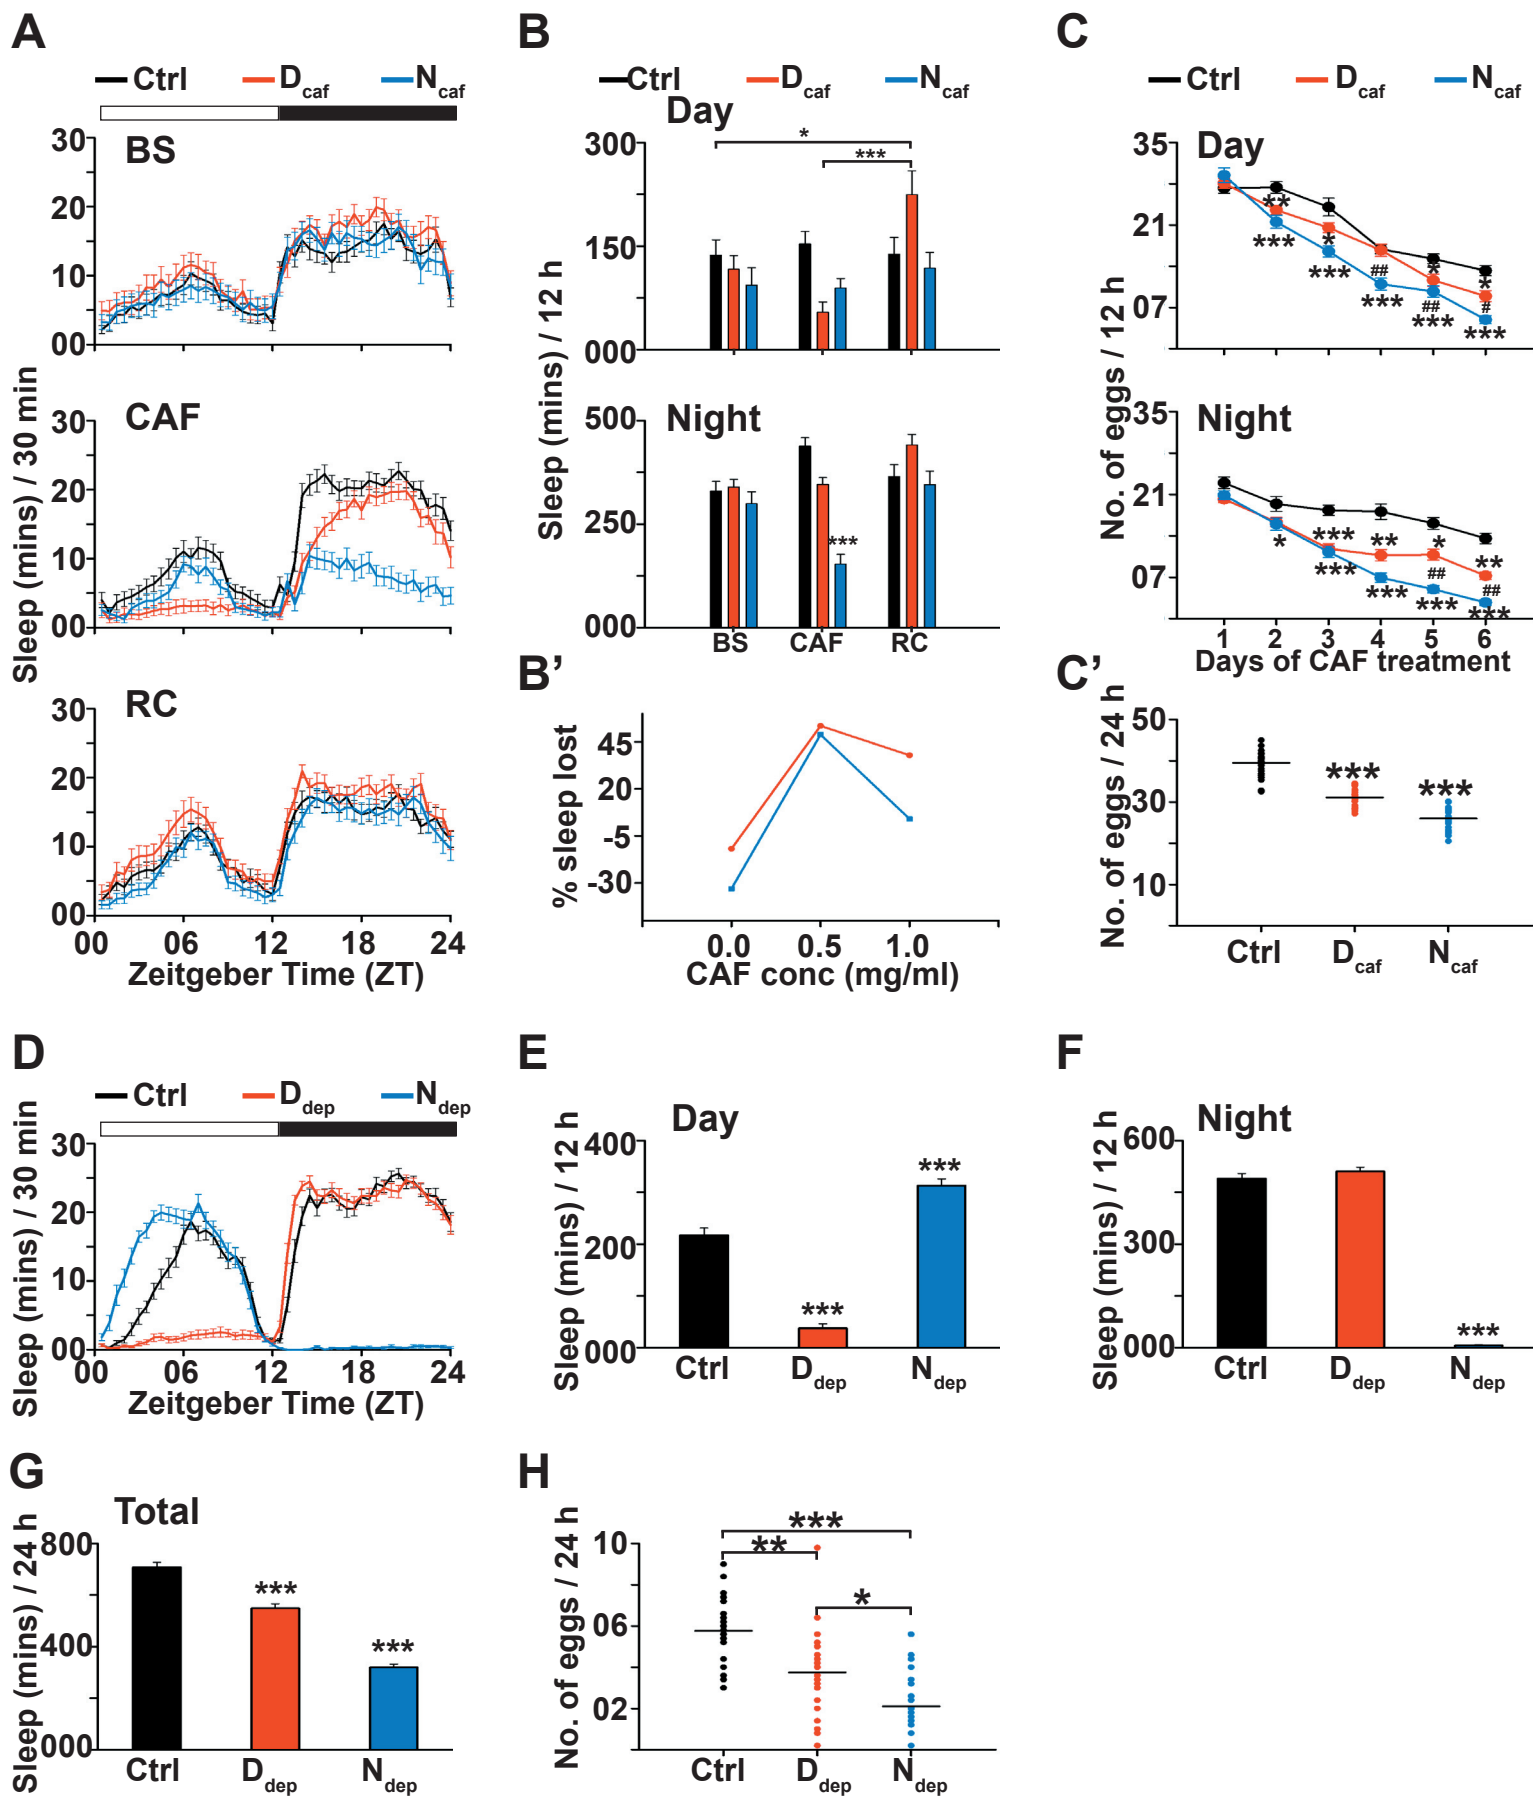

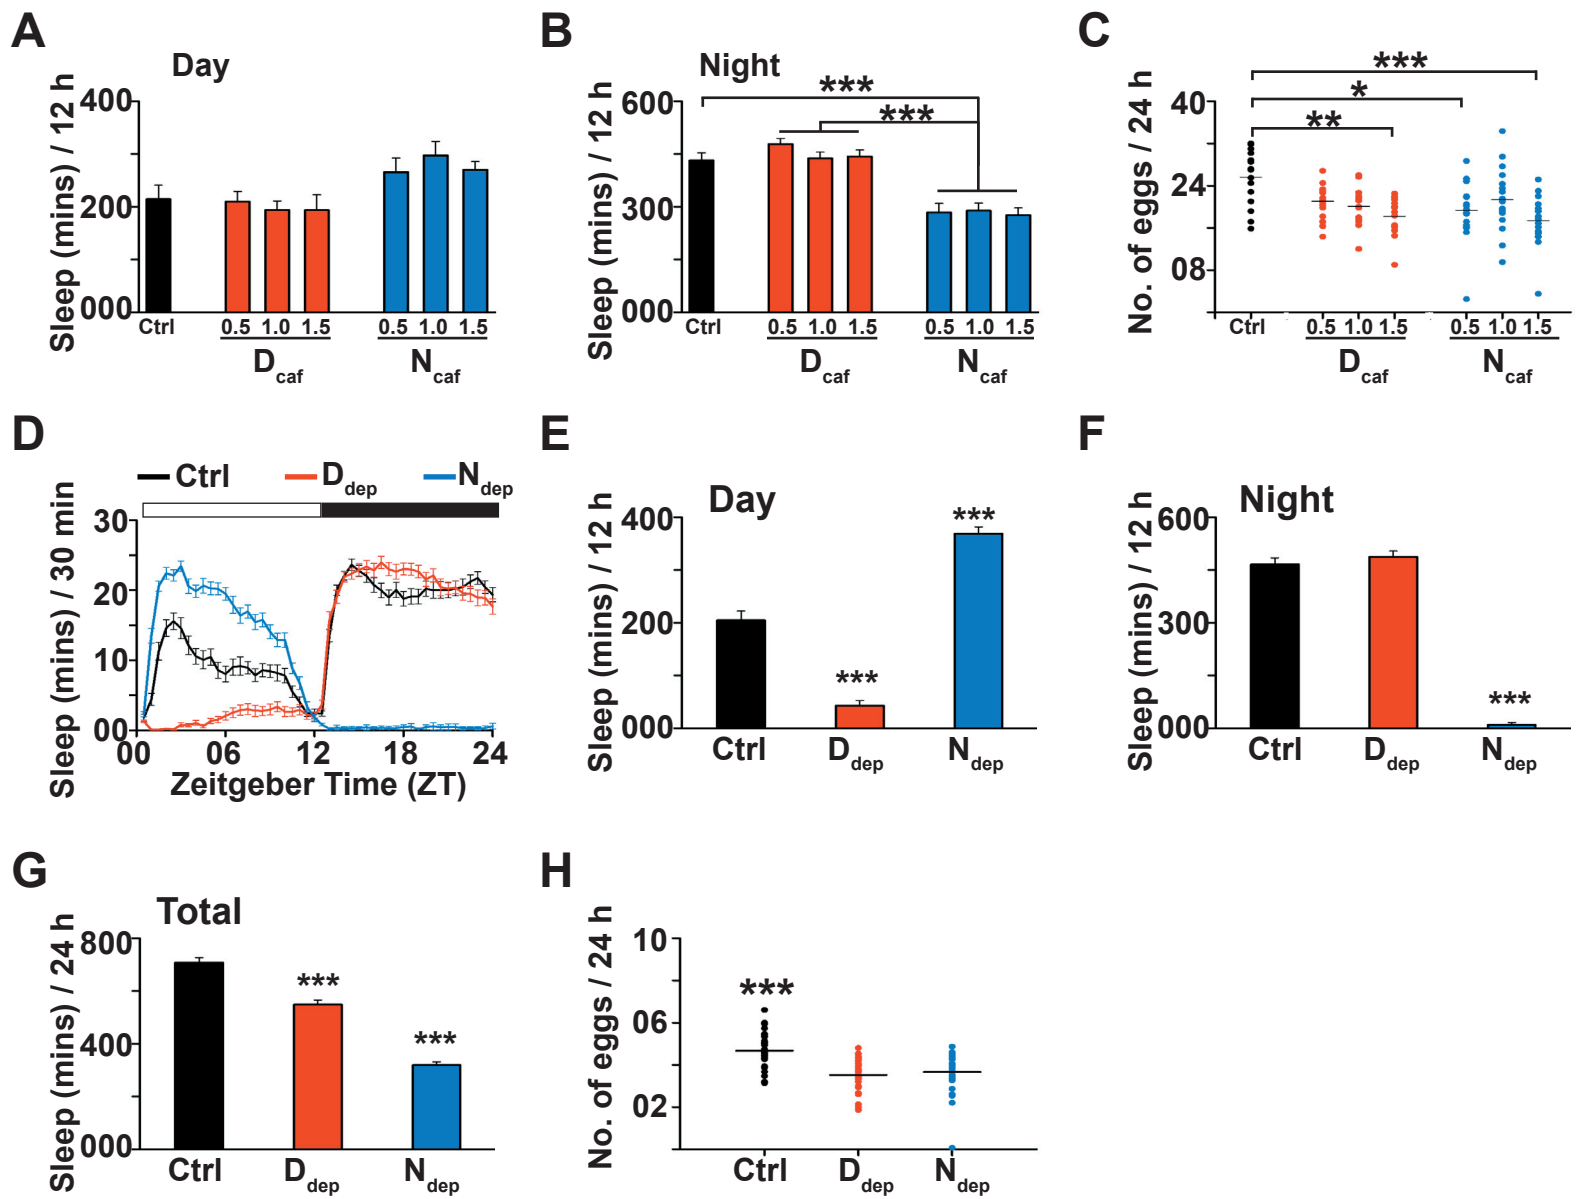

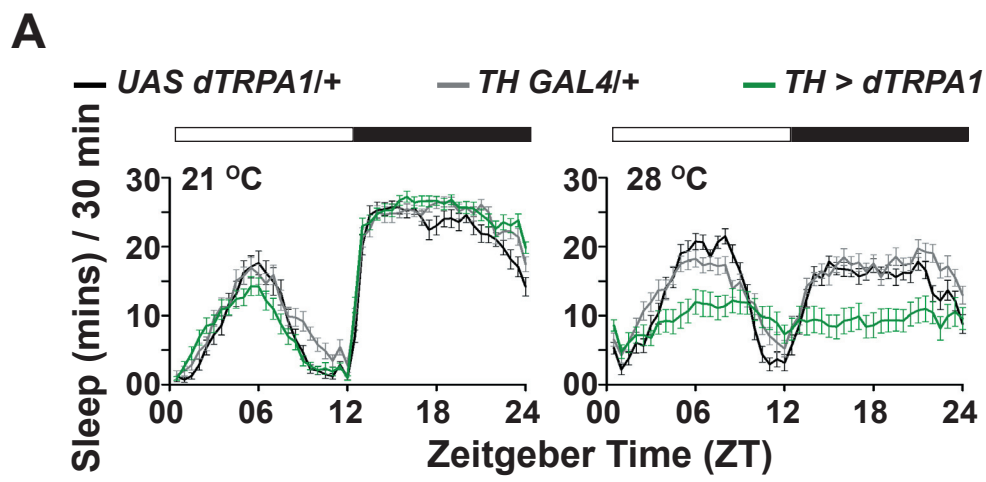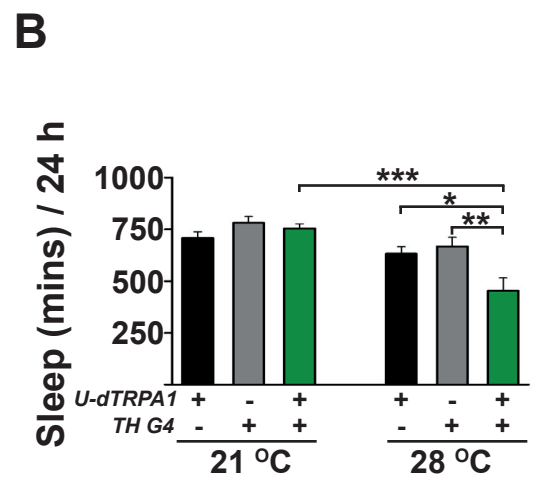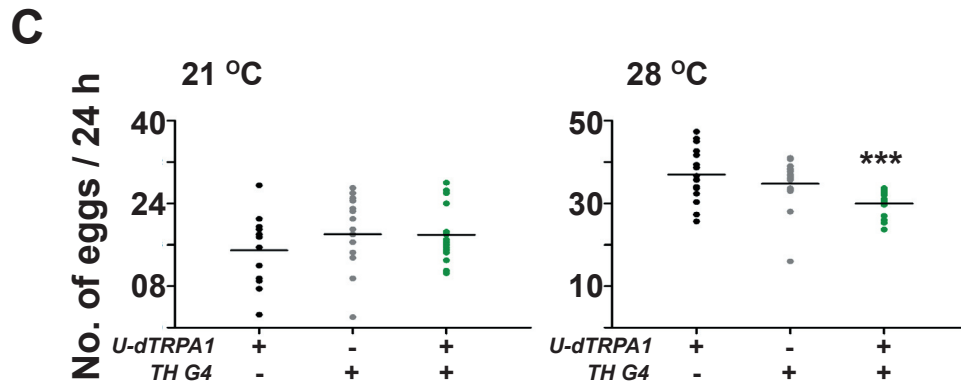

**A**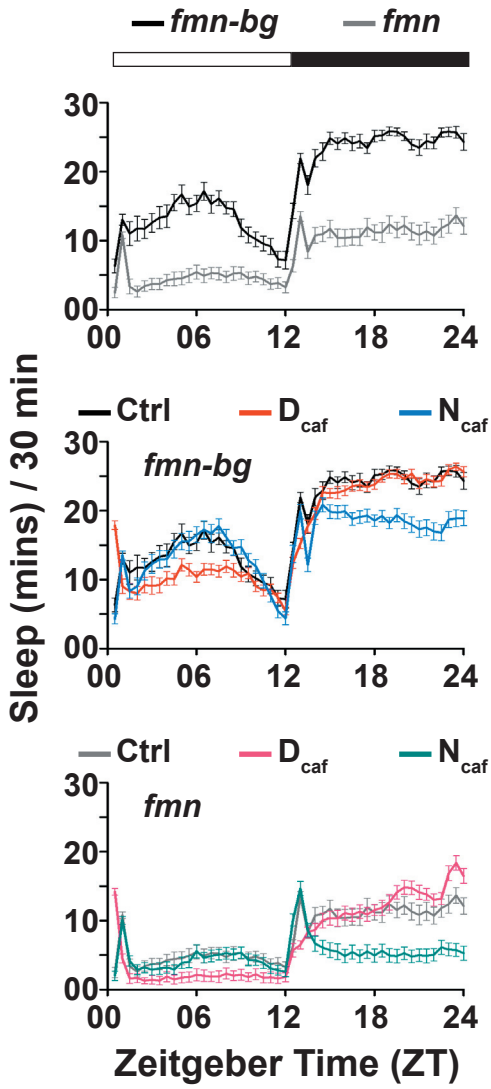**B**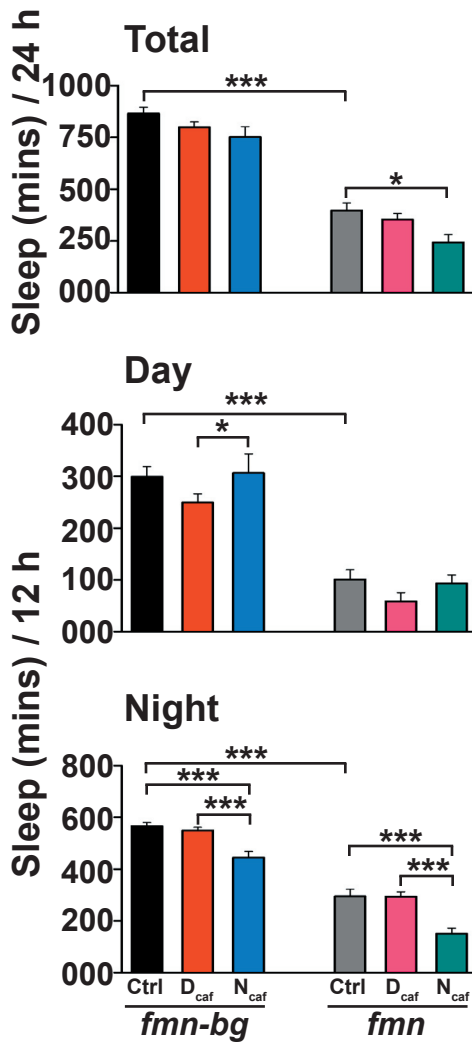**C**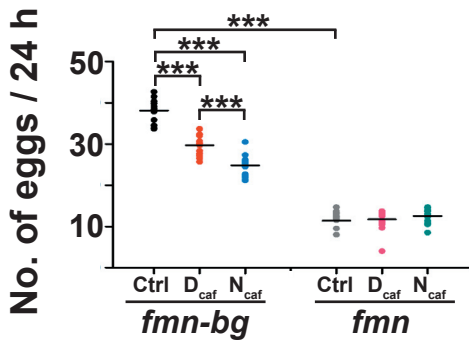



**A**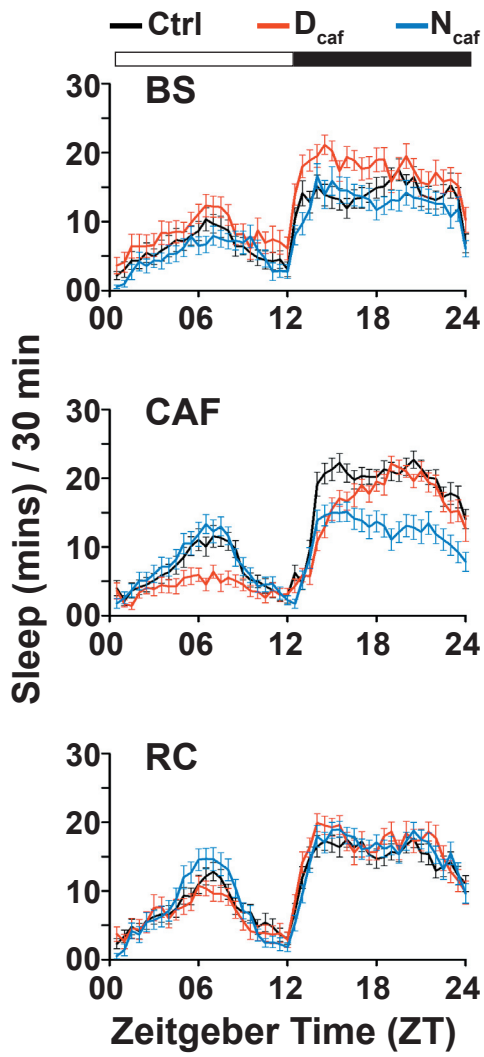**B**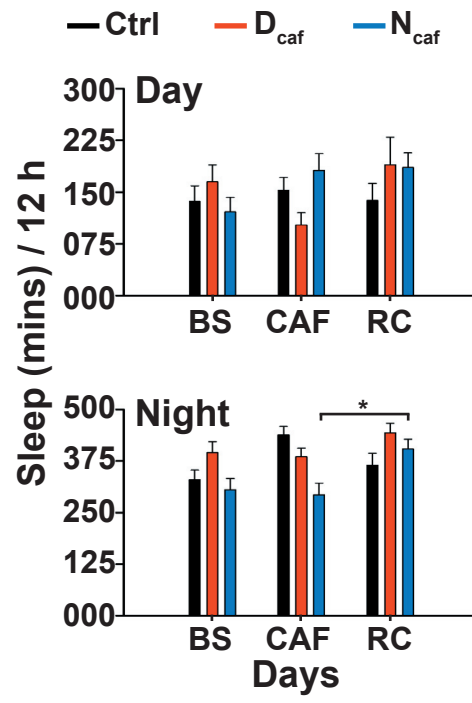

**A**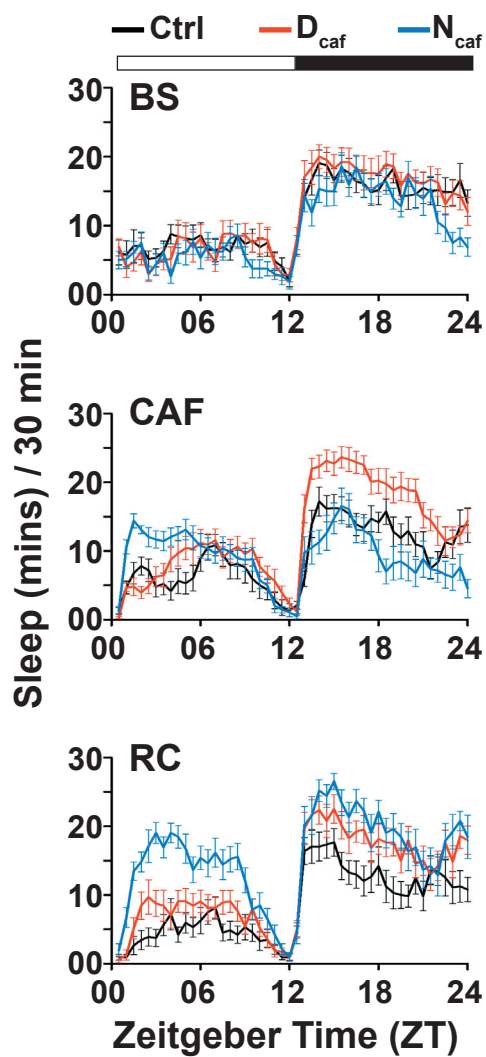**B**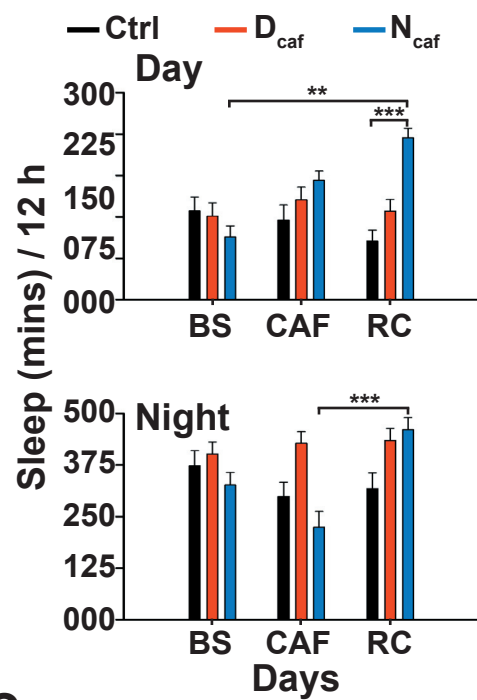**C**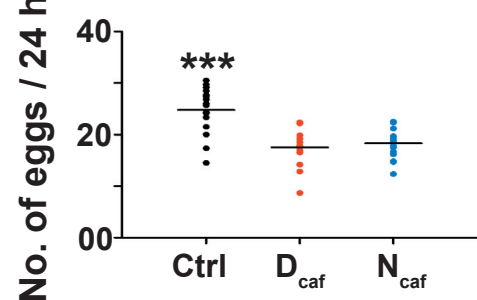

**A**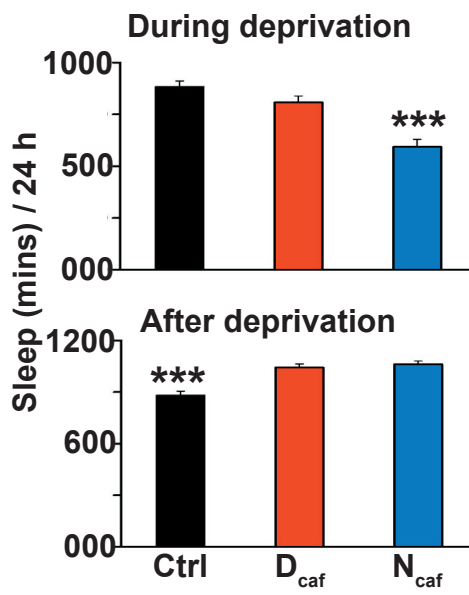**B**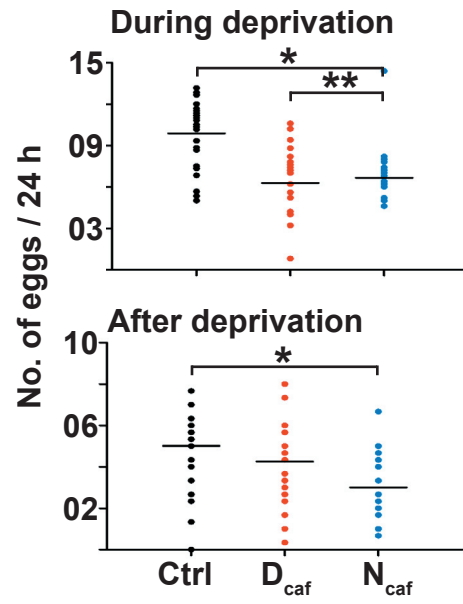

Source: https://www.biorxiv.org/content/biorxiv/early/2017/06/30/158071.full.pdf
